# Supplementary material for: Exploring the unmapped DNA and RNA reads in a songbird genome
Source: PubMed Central journal article supplement (PMC6323668; doi:10.1186/s12864-018-5378-2), 2019-01-08

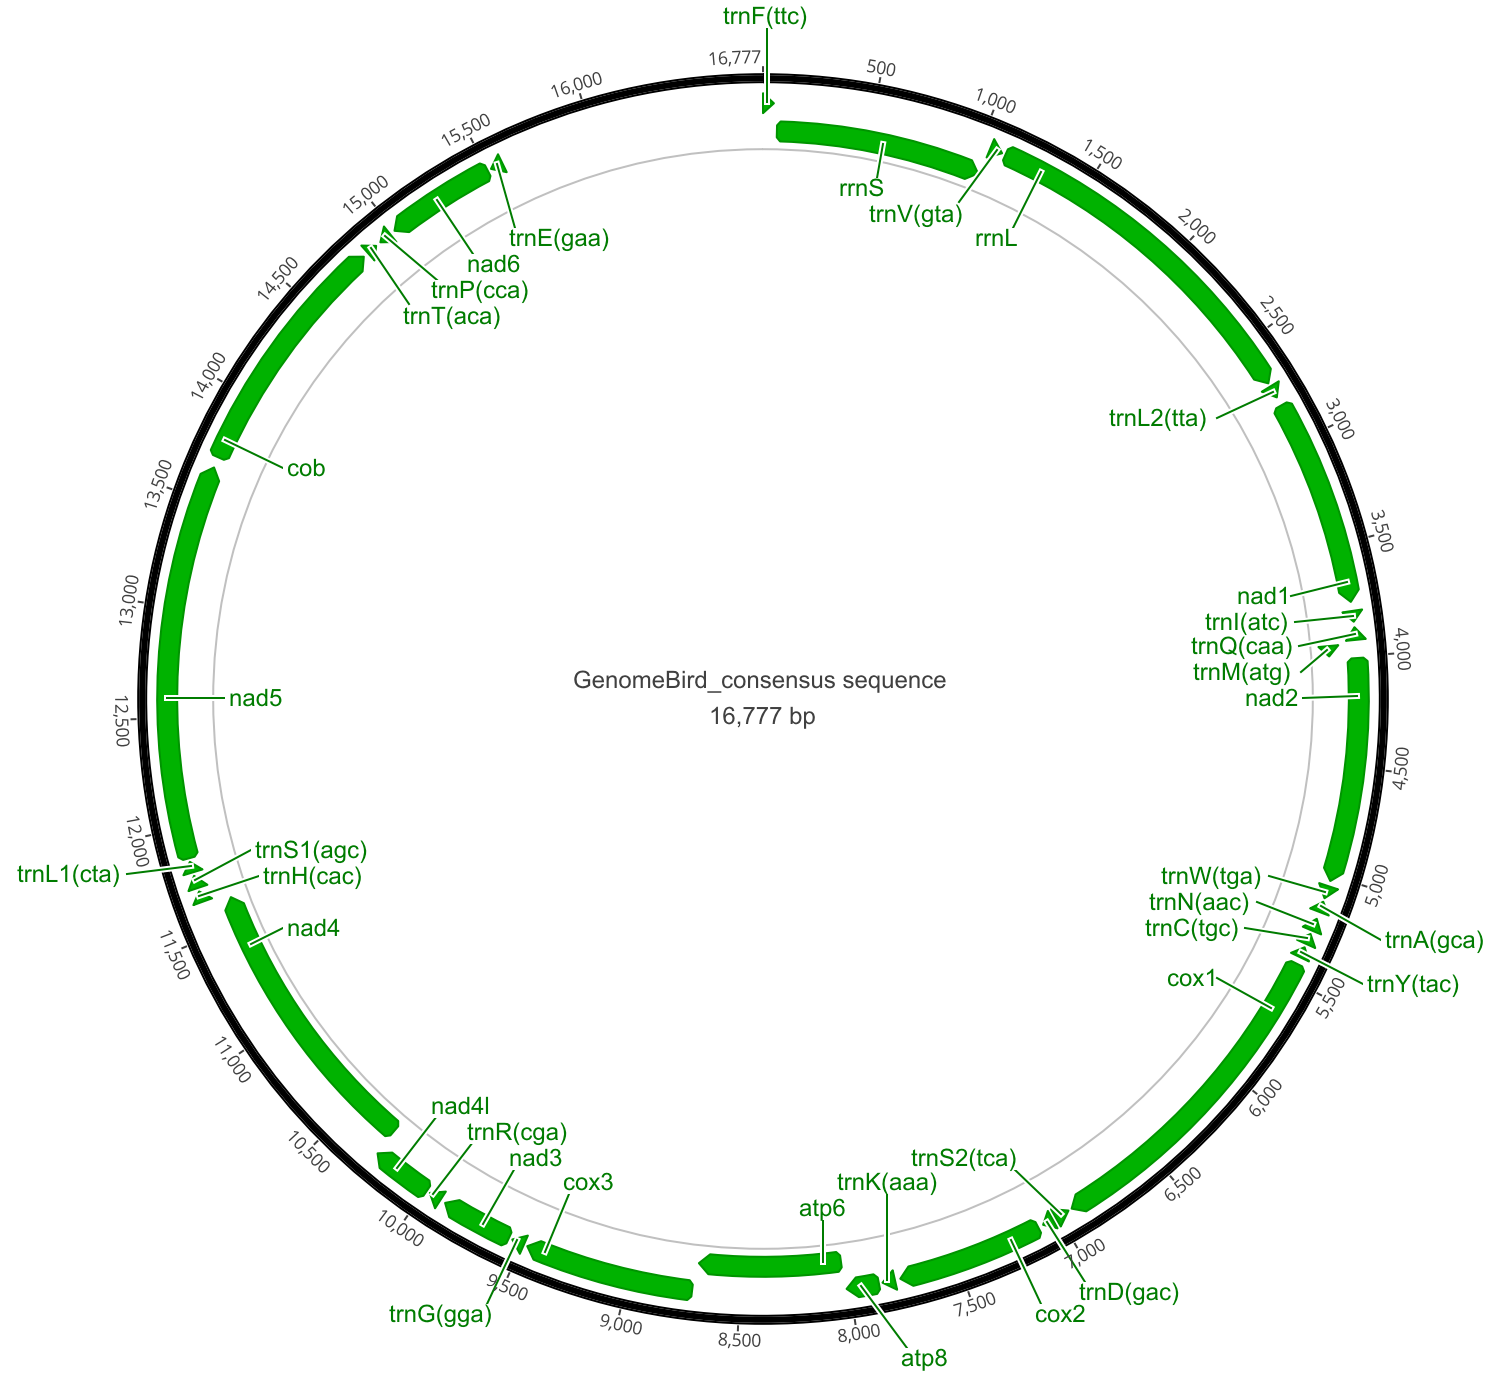

Supplement: 12864_2018_5378_MOESM2_ESM.pdf [file 12864_2018_5378_MOESM2_ESM.pdf]
