# Supplementary material for: Exploring the unmapped DNA and RNA reads in a songbird genome
Source: PubMed Central journal article supplement (PMC6323668; doi:10.1186/s12864-018-5378-2), 2019-01-08
Supplement: 12864_2018_5378_MOESM3_ESM.pdf [file 12864_2018_5378_MOESM3_ESM.pdf]

AY732701  
AY732712  
AY732714  
AY732724  
AY732717  
AY732702  
AY732705  
AY732706  
AY732707  
AY732709  
AY732710  
AY732716  
AY732718  
AY732720  
AY732721  
AY732728  
AY732729  
KF183837

Parus minor node

AY732703  
NC\_026293  
AY732723  
AY732715  
AY732711  
AY732713  
AY732719  
AY732708  
AY732722  
AY732727  
AY732704  
AY732725  
AY732726

KJ455538

AY732643  
AY732618  
AY732656  
AY732676  
AY732664  
AY732613  
AY732623  
AY732642  
AY732645  
AY732657  
AY734249  
AY732622  
AY732633  
AY732648  
AY732654  
AY732624  
AY732635  
AY732653  
AY732671  
AY732684  
AY732694  
AY732620  
AY732637  
AY732632  
AY732650  
AY732669  
AY732683  
AY732693  
AY732619  
AY732631  
AY732652  
AY732660  
AY732665  
AY732667  
AY732677  
AY732627  
AY732639  
AY732659  
AY732675  
AY732687  
KU859303  
AY732614  
AY732616  
AY732689  
AY732696  
AY732672  
AY732625  
AY732636  
AY732655  
AY732673  
AY732685  
AY734250  
AY732628  
AY732640  
AY732682  
AY732641  
AY732661  
AY732678  
AY732688  
KU859306  
AY732621  
AY732651  
AY732626  
AY732638  
AY732658  
AY732674  
AY732686  
AY734251  
AY732615  
AY732634  
AY732670  
KU859304  
Reference\_mitochondria  
AY732629  
AY732644  
AY732663  
AY732679  
AY732646  
AY732647  
AY732691  
AY732666  
AY732680  
AY732692  
AY732617  
AY732662  
AY732695  
KU859305  
AY732630  
AY732649  
AY732668  
AY732681  
AY732690  
KU859307

Parus major node

0.004
